# Supplementary material
Source: publisher site journal article supplement (https://www.dovepress.com/article/506457)
Supplement: Supplementary file 1 [file get_supplementary_file.php]

| Supplementary Table1. subsequent treatment for the TACEHL and the TACE groups before and after PSM | | | | | |
| --- | --- | --- | --- | --- | --- |
|  | Before matching | | After matching | | |
| Subsequent treatment | TACEHL  (n=127) | TACE  (n=167) | TACEHL  (n=91） | TACE  (n=91） | |
| Surgical resection | 32(25.2%) | 19(11.3%) | 25(27.5%) | 8(8.8%) | |
| Ablation | 55(43.3%) | 26(15.6%) | 40(44.0%) | 11(12.1%) | |
| TKI | 0(0%) | 28(16.8%) | 0(0%) | 14(15.4%) | |
| TKI-ICI | 42(33.1%) | 86(51.5%) | 29(31.9%) | 48(52.7%) | |
| Radiotherapy | 6(4.7%) | 51(30.5%) | 5(5.5%) | 25(27.5%) | |

**Abbreviation.** PSM: Propensity Score Matching; TACE: transarterial chemoembolization; TACEHL: Transarterial chemoembolization combined with hepatic arterial infusion chemotherapy plus Lenvatinib; TKI: Tyrosine kinase inhibitors; TKI-ICI: Tyrosine kinase inhibitors combined with immune checkpoint inhibitors.
